# Supplementary material for: The association of environmental heat stress with performance: analysis of the 2014 FIFA World Cup Brazil
Source: PubMed Central journal article supplement — Br J Sports Med. 2015 Feb 17;49(9):609–13. doi: 10.1136/bjsports-2014-094449 (PMC4413686; doi:10.1136/bjsports-2014-094449), 2015-02-17

Supplementary Figure

Traditional risk assessment during a football game based on ACSM recommendations and WBGT only [3, 14] and risk assessment based on WBGT and relative humidity (RH) [15].

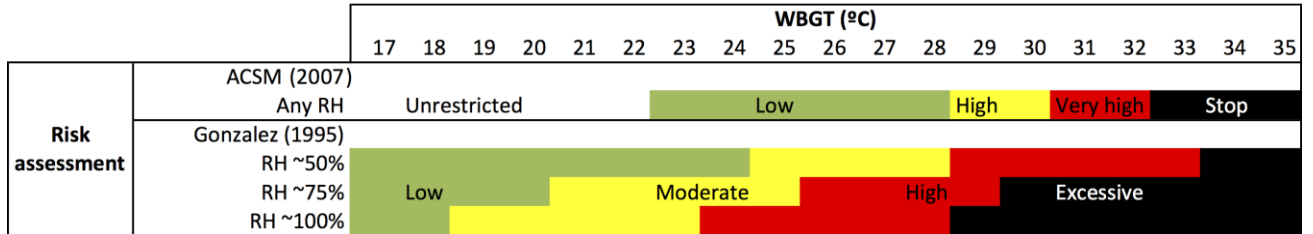

Supplement: bjsports-2014-094449-s1.pdf [file bjsports-2014-094449-s1.pdf]
